1 Genetic and Physiological Characterization of the Antibacterial Activity of *Bacillus*  
2 *subtilis* subsp. *inaquosorum* Strain T1 Effective Against *pirAB*<sup>Vp</sup>-Bearing *Vibrio*  
3 *parahaemolyticus*

4  
5 Sarah E. Avery<sup>a\*</sup>, Susannah P. Ruzbarsky<sup>a,b\*</sup>, Amanda M. Hise<sup>b</sup> and  
6 Harold J. Schreier<sup>a,b#</sup>

7  
8  
9  
10 <sup>a</sup>Department of Biological Sciences, University of Maryland Baltimore County,  
11 Baltimore, Maryland, USA

12  
13 <sup>b</sup>Department of Marine Biotechnology, Institute of Marine and Environmental  
14 Technology, University of Maryland Baltimore County, Baltimore, Maryland, USA

15  
16 \*Sarah Avery and Susannah Ruzbarsky contributed equally to this article. Author order  
17 was determined alphabetically.

18  
19 \*Corresponding author:

20 Department of Marine Biotechnology, Institute of Marine and Environmental  
21 Technology, University of Maryland Baltimore County, 701 E. Pratt St., Baltimore, MD  
22 21202, [Schreier@umbc.edu](mailto:Schreier@umbc.edu)

23  
24 Running Title: *Bacillus subtilis* subsp. *inaquosorum* strain T1 antibacterial activity

25

26 **ABSTRACT**

27 Acute hepatopancreatic necrosis disease (AHPND) is caused by PirAB toxin-  
28 producing *Vibrio parahaemolyticus* and has devastated the global shrimp aquaculture  
29 industry. One approach for preventing growth of AHPND-producing *Vibrio* spp. is  
30 through the application of beneficial bacteria capable of inhibiting these pathogens. In  
31 this study we focus on the inhibitory activity of *Bacillus subtilis* subsp. *inaquosorum*  
32 strain T1, which hinders *V. parahaemolyticus* growth in co-culture experiments in a  
33 density-dependent manner; inhibition was also obtained using cell-free supernatants  
34 from T1 stationary phase cultures. Using a *mariner*-based transposon mutagenesis, 17  
35 mutants were identified having complete or partial loss of inhibitory activity. Of those  
36 having total activity loss, 13 had insertions within a 42.6 kb DNA region comprising 15  
37 genes whose deduced products were homologous to non-ribosomal polypeptide  
38 synthetases (NRPSs), polyketide synthases (PKSs) and related activities, which were  
39 mapped as one transcriptional unit. Mutants with partial activity contained insertions in  
40 *spo0A* and *oppA*, indicating stationary phase control. Expression of *lacZ* transcriptional  
41 fusions to NRPS and PKS genes was negligible during growth and at their highest  
42 during early stationary phase. Inactivation of *sigH* resulted in loss of inhibitor activity,  
43 indicating a role for  $\sigma^H$  in transcription. Disruption of *abrB* resulted in NRPS and PKS  
44 gene overexpression during growth as well as enhanced growth inhibition. This is the  
45 first study examining expression and control of an NRPS-PKS region unique to the  
46 *inaquosorum* subspecies of *B. subtilis* and an understanding of factors involved in T1  
47 inhibitor production will enable its development for use as a potential tool against  
48 AHPND *Vibrio* pathogens in shrimp aquaculture.

49 **IMPORTANCE**

50           The shrimp aquaculture industry has been impacted by the rise of acute  
51 hepatopancreatic necrosis disease (AHPND), resulting in significant financial losses  
52 annually. Caused by strains of the bacterial pathogen, *Vibrio parahaemolyticus*,  
53 treatment of AHPND involves the use of antibiotics, which leads to a rise in antibiotic  
54 resistant strains. An alternative approach is through the application of beneficial  
55 microorganisms having inhibitory activities against AHPND-generating pathogens. In  
56 this study, we examine the genetic basis for the ability of *Bacillus subtilis* strain T1 to  
57 inhibit growth of an AHPND *Vibrio* strain and show that activity is associated with genes  
58 having the potential for synthesizing antibacterial compounds. We found that  
59 expression of these genes is under stationary phase control and showed that  
60 inactivation of a global transition state regulator results in enhancement of inhibitory  
61 activity against the AHPND *Vibrio*. Our approach for understanding the factors involved  
62 in production *B. subtilis* strain T1 inhibitory activity may allow for development of this  
63 strain for use as a potential tool for the prevention of AHPND outbreaks.

64

## 65 INTRODUCTION

66 Acute hepatopancreatic necrosis disease (AHPND) in juvenile penaeid shrimp,  
67 also known as early mortality syndrome (EMS), first emerged in China in 2009 (1) and  
68 has spread to Vietnam, Malaysia, Thailand, Mexico, the Philippines and throughout  
69 South America (1) as well as the United States (2). AHPND leads to 100% mortality  
70 and has resulted in annual losses for shrimp farming estimated to be over 1 billion US  
71 dollars (3). The disease is caused by strains of *Vibrio parahaemolyticus* that carry a  
72 plasmid encoding a *Photothabdus* insect-related binary toxin PirAB, also known as Pir-  
73 likeAB and PirVP (4-6). AHPND is lethal in both *Penaeus monodon* and *Litopenaeus*  
74 *vannemei*, the two most cultivated shrimp species in the aquaculture industry (3).  
75 Treatment has led to the inevitable increase in resistance to commonly used antibiotics,  
76 e.g., oxytetracycline, quinolones and amoxicillin (7, 8). Thus, alternative approaches for  
77 preventing and treating this disease are required.

78 Colonization by AHPND-causing *V. parahaemolyticus* strains creates a major  
79 shift in the microbiota of the shrimp gut (9). In healthy shrimp, Rhodobacterales and  
80 Rhizobiales along with Planctomycetales are the major contributors to the gut  
81 microbiome. Post-infection, the Mycoplasmatales and Vibrionales are the dominant gut  
82 inhabitants (10). The practice of draining and disinfecting ponds between shrimp stocks  
83 may increase the risk of an AHPND outbreak by removing beneficial bacteria.  
84 Manipulating microbial communities using “microbially mature” water has been shown to  
85 increase survival of fish larvae over the use of filter-sterilized water (11). Thus, one  
86 approach to combating this disease is through the use of beneficial bacteria—  
87 probiotics—capable of positively modifying shrimp microbial communities and, at the

88 same time, interfering with growth of pathogens like the AHPND-causing strains.  
89 Probiotics are live microorganisms that, when administered in adequate amounts,  
90 confer health benefits to the host (12). These benefits occur through a variety of  
91 mechanisms, including the production of antimicrobial compounds (12).

92 A group of bacteria that have received attention for their probiotic potential are  
93 the Gram-positive spore-forming *Bacillus* sp. due to the antimicrobial activities of their  
94 structurally diverse secondary metabolites including polyketides, aminoglycosides, and  
95 nonribosomal peptides such as bacteriocins and lipopeptides (13, 14). Production of  
96 these antimicrobial compounds is usually associated with stationary phase physiology,  
97 which is associated with adverse changes in their environment. Biosynthetic pathways  
98 for these activities are often organized as operons and include nonribosomal peptide  
99 synthetases and polyketide synthases, which are modular in design and are arranged in  
100 various combinations resulting in the production of different compounds (15, 16). Many  
101 act through permeabilization and destruction of the cell membrane and other  
102 mechanisms (15).

103 The present study focuses on *Bacillus subtilis* subsp. *inaquosorum* strain T1,  
104 which we have found to possess an inhibitory activity against AHPND-producing *Vibrio*  
105 *parahaemolyticus* strains (17). As a member of the *inaquosorum* subspecies [(17) and  
106 Schreier, unpublished], it is similar to the *stercoris* subspecies of *B. subtilis* but differs  
107 from *subtilis* and *spizizeni* subspecies due to coding capacity for an uncharacterized  
108 nonribosomal peptide synthetase (NRPS)-polyketide synthase (PKS) gene cluster (18).  
109 In this study we demonstrate that T1 inhibitory activity is associated with a secreted  
110 product and we demonstrate the involvement of the NRPS-PKS-encoding region in this

111 activity. We found that NRPS-PKS gene expression was negligible during mid-  
112 exponential growth and at highest during stationary phase and that stationary phase  
113 regulators *oppA* (*spo0K*), *spo0A*, and *sigH* (*spo0H*) are involved in their control. Finally,  
114 disruption of the global transitional phase regulator *abrB* resulted in derepressed NRPS-  
115 PKS expression during exponential phase and enhanced inhibitory activity. Our study  
116 examines expression and control of an NRPS-PKS region unique to the subspecies  
117 *inaquosorum* of *B. subtilis* and we suggest that our ability to manipulate strain T1 to be  
118 an effective inhibitor against an AHPND-producing *Vibrio* strain may be one approach  
119 for developing tools for use as probiotics against AHPND in shrimp.

## 120 **METHODS**

121 **Bacterial Strains and Culture Media.** Bacterial strains used in this study and  
122 their sources are listed in Table 1. Strains were grown in Zobell 2216 marine broth  
123 (HiMedia Laboratories), tryptic soy broth (Sigma-Aldrich) or agar supplemented with 2%  
124 NaCl (TSB2 or TSA2, respectively) and lysogeny broth (LB) agar (19) with antibiotic,  
125 when appropriate. SOC and 2XYT have been described (19). Antibiotics were added  
126 to media at concentrations of 100 µg spectinomycin (Sp)/ml, 1 µg erythromycin (Em)/ml  
127 and 10 µg lincomycin (Ln)/ml. Strain T1g was constructed by transforming strain T1 by  
128 electroporation (described below) with DNA from *B. subtilis* strain AR13 (*amyE::gfp*) and  
129 selecting for spectinomycin-resistance (Sp<sup>R</sup>). Incorporation of *gfp* into *amyE* was  
130 confirmed by the loss of amylase activity on starch agar and by an increased size of  
131 *amyE* by PCR. Disruption of *amyE* did not affect D4 inhibitory activity as determined by  
132 overlay or co-culture assays (see below); T1 and T1g were interchangeable and their  
133 choice for usage depended on the experiment. Strains SSh1(*sigH::erm*) and  
134 S Sa1(*abrB::erm*) were constructed by transforming strain T1 with DNA from *B. subtilis*  
135 strains BKE00980 (*sigH::erm*) and BKE00370 (*abrB::erm*), respectively, selecting for  
136 Em- and Ln-resistance; insertion of the *erm* cassette was confirmed by PCR. *Vibrio*  
137 *parahaemolyticus* strains D4, isolated from Mexico, and A3, isolated from Viet Nam,  
138 were provided by Dr. Kathy Tang-Nelson, University of Arizona and the presence of  
139 *pirAB* was confirmed by PCR.

140 **Soft Agar Overlay Assay.** To evaluate inhibitory activity, 2.5 µl from an  
141 overnight *B. subtilis* culture was spotted onto 2216 agar and incubated at 37°C for 18  
142 hr. In a chemical fume hood, uncovered plates were placed in a pyrex dish along with a

143 reservoir of chloroform (20 to 30 ml); the dish was then covered with plastic wrap to  
144 generate a chloroform atmosphere and facilitate cell death. After 30 min, plates were  
145 removed, covered, and set at room temperature for 30 min to allow for chloroform  
146 evaporation. For each plate, 3 ml of semi-solid 2216 agar (2216 broth with 0.75% Bacto  
147 agar) was heated until liquified, cooled to 42°C, inoculated with 10 µl of an overnight *V.*  
148 *parahaemolyticus* culture, and immediately poured over the 2216 agar surface. Plates  
149 were incubated at 28°C overnight and examined for zones of clearance.

150 **Co-Culture Growth Experiments.** Growth experiments examining the effect of  
151 T1g or mutant A3-41 on D4 growth were done by combining overnight cultures of D4  
152 with T1g or A3-41 at various cell densities in fresh liquid 2216 broth and monitoring D4  
153 by quantitative PCR (qPCR) (see below). The qPCR target to assess densities of T1g,  
154 mutant A3-41, and strain D4 were *gfp*, *amyE*, and *toxR*, respectively, and primers are  
155 listed in Table 2. Inocula for co-cultures were based on colony forming units/ml  
156 (CFU/ml) for each strain in 2216 broth, which ranged from  $2.0 \times 10^{10}$  to  $3.0 \times 10^{10}$   
157 CFU/ml for D4 and  $2.0 \times 10^9$  to  $3.0 \times 10^9$  CFU/ml for strains T1g and A3-41. Overnight  
158 cultures of T1g, A3-41, and D4 were prepared in 2216 broth and were used to inoculate  
159 50 ml of 2216; overnight cultures of T1g and A3-41 were rinsed and suspended in fresh  
160 2216 prior to their use as inoculants. Initial cell density for D4 was  $2.0 \times 10^4$  CFU/ml  
161 and initial cell densities for T1g and A3-41 ranged from  $2.0 \times 10^4$  to  $2.0 \times 10^6$  CFU/ml to  
162 generate T1g or A3-41 to D4 ratios of 1:1, 10:1, and 100:1, respectively. Cultures were  
163 grown at 28°C and 240 RPM for 24 hr. At 3 hr after inoculation, 10 ml of each culture  
164 was centrifuged at 4°C, 4,000 x g for 10 min; at 24 hr after inoculation, 0.5 ml of each  
165 culture was centrifuged at 4°C, 10,000 x g for 5 min. To assist in the recovery of low-



166 density D4 cultures at the 3 hr time point, autoclaved *Aeromonas hydrophila* was added  
167 to each sample to a final concentration of  $10^5$  CFU/ml prior to centrifugation. Extraction  
168 of DNA from each sample was done using the Wizard Genomic DNA Purification Kit  
169 (Promega) following the manufacturer's specifications.

170 **Cell-free culture supernatant experiments.** Overnight cultures grown in 2216  
171 broth were centrifuged at  $4^\circ\text{C}$ ,  $5,000 \times g$  for 10 min and supernatant fractions were  
172 passed through a  $0.2 \mu\text{m}$  filter. Filtered supernatants were then added to fresh 2216  
173 medium in 50 ml sidearm flasks to a final concentration of 50% in a total volume of 12  
174 ml. The control flask received 12 ml of fresh 2216 broth. Each culture was then  
175 inoculated with D4 at a concentration of  $2.0 \times 10^4$  CFU/ml and cultures were grown at  
176  $28^\circ\text{C}$  and 240 RPM, monitoring growth using a Klett-Summerson Colorimeter with a  
177 Wratten 54 filter. Two 1 ml samples were taken from each flask at 5.5 hr after  
178 inoculation, followed by DNA extraction as described above.

179 **qPCR analysis.** qPCR was performed in  $10 \mu\text{l}$  reactions containing  $5 \mu\text{l}$  of  
180 PefeCTa SYBR Green Fastmix (Quanta),  $3.5 \mu\text{l}$  PCR-certified water,  $0.25 \mu\text{l}$  of 1/10  
181 diluted forward and reverse primers ( $0.5 \mu\text{M}$ ) each, and  $1 \mu\text{l}$  of the sample to be  
182 quantified. All qPCR reactions were performed using an Applied Biosystems 7500 Fast  
183 Real-Time PCR machine. PCR-certified water was used for the no template control to  
184 monitor for contamination. Primers for qPCR are listed in Table 2. The DNA template  
185 for standard curves was prepared by PCR performed in  $50 \mu\text{l}$  reactions containing  $25 \mu\text{l}$   
186 Taq PCR Mastermix (Qiagen),  $19 \mu\text{l}$  PCR-certified water,  $2 \mu\text{l}$  of 1/10 diluted forward  
187 and reverse primer ( $0.5 \mu\text{M}$ ) for *toxR*, *gfp* and *amyE* (Table 2), and  $2 \mu\text{l}$  of DNA  
188 template. Chromosomal DNA from D4, T1g, and T1 were used for the DNA templates

189 for *toxR*, *gfp*, and *amyE*, respectively. PCR products were then purified using the  
190 MinElute PCR Purification Kit (Qiagen) according to the manufacturer's specifications  
191 and concentration (ng/ml) was determined using a Qubit Fluorometer (ThermoFischer).

192 **Plasmids.** Mariner-derived *himar1* delivery vectors pDP384 (*TnKRMspec amp*  
193 *mls mariner-Himar1ori(TS)<sub>BS</sub>*) and pEP4 (*TnLacJump spec amp mls mariner-*  
194 *Himar1ori(TS)<sub>BS</sub>*) (20) were used for transposon mutagenesis of strain T1 and were  
195 provided by Dr. Daniel Kearns, Indiana University. The plasmids harbor a temperature-  
196 sensitive *B. subtilis* origin of replication and erythromycin-resistance ( $Em^R$ ) located  
197 outside of transposon sequences and  $Sp^R$  contained within transposon sequences.  
198 Growth at the restrictive temperature and selection for  $Sp^R$  resulted in the identification  
199 of cells containing chromosomal insertions. Plasmid pEP4 differs from pDP384 by the  
200 presence of a promoter-less *lacZ* gene within transposon sequences, which is  
201 expressed when inserted downstream of an active transcription start-site (20).  
202 Plasmids were purified using a Wizard DNA Clean-Up Kit (Promega) according to  
203 manufacturer's standards.

204 **Electroporation of T1 with Delivery Vectors and Mutagenesis.** T1 was  
205 prepared for electroporation by growing in 250 ml of 2xYT to  $OD_{600}=0.8$  at 37°C, 240  
206 RPM, washing cells three times in ice cold 10% glycerol and suspending in 1 ml ice cold  
207 10% glycerol, storing at -80°C in 200  $\mu$ l aliquots. For electroporation, one aliquot was  
208 mixed with purified plasmid ( $\sim 7 \mu$ g/ml) then incubated on ice for 5 min. The cells were  
209 then transferred to a 2 mm electroporation cuvette and electroporation was done using  
210 the "StA" program of a Bio-Rad MicroPulser electroporation apparatus ( $\sim 1.8$  kV for 2.5  
211 msec). After electroporation, 0.5 ml SOC was added and cells were incubated at 28°C

212 with aeration for 2 hr, followed by plating onto LB+Sp+Em agar. The presence of the  
213 transposase gene in several Sp<sup>R</sup> Em<sup>R</sup> transformants was confirmed by PCR and one  
214 transformant was selected for mutagenesis. After growth in LB+Sp for 18 hr at 42°C,  
215 cells were plated onto LB+Sp agar at a dilution of 10<sup>-6</sup>. Approximately 3,000  
216 transposants were screened for decreased or lost D4 inhibitory activity by the presence  
217 of reduced (relative to a wild-type control) or absent clearance zones, respectively,  
218 using the overlay assay substituting TSA2 for 2216 agar, as described above.

### 219 **Mutant Characterization and Identification of Transposon Insertion Site.**

220 Confirmation that Sp<sup>R</sup> was due to transposon insertion was done by PCR using primer  
221 set 2569R/2570R (Table 2) followed by visualization via agarose gel-electrophoresis.  
222 PCR was carried out in 25 µl reactions with Qiagen *Taq* polymerase using a Bio-Rad  
223 S1000 Thermal Cycle for 3 min at 94°C followed by 30 cycles of 1 min at 94°C, 1 min at  
224 55°C, 1 min at 72°C, and a final step at 72°C for 10 min. To ensure that a mutant had  
225 only one insertion, chromosomal DNA was prepared from that mutant and re-  
226 transformed into strain T1 by electroporation, selecting for Sp<sup>R</sup>. Insertion site  
227 identification was determined by amplification of the transposon and adjacent DNA  
228 using an inverse PCR strategy as follows. One µg of chromosomal DNA from T1  
229 mutants was digested with *TaqI* for 2 hr at 37°C in 20 µl and one µl from this reaction  
230 was then ligated using the T4 DNA Rapid Ligation Kit (Thermo Scientific) for 5 min at  
231 room temperature according to manufacturer's specifications. The ligation mixture was  
232 then used in a PCR reaction with primers 2569/2570 (Table 2) and Phusion DNA  
233 polymerase (New England BioLabs). PCR was carried out in 50 µl reactions for 3 min  
234 at 98°C followed by 30 cycles of 1 min at 98°C, 1 min at 55°C and 1 min at 72°C, and a

235 final step at 72°C for 10 min. PCR products were purified using the Wizard PCR Preps  
236 DNA Purification System (Promega) and DNA sequencing was performed using primer  
237 2569, which anneals to transposon sequences adjacent to the insertion site.

238 Comparison of DNA sequences interrupted by the transposon to database sequences  
239 was done by BLAST (21) and BLASTp (22).

240 **Isolation of RNA.** Overnight cultures of T1 grown in 2216 broth were used to  
241 inoculate 10 ml of 2216 broth and at ~1-2 hour before (T<sub>-1</sub>) and after reaching stationary  
242 phase (T<sub>1</sub>) 1 ml samples were removed and centrifuged at 10,000 rpm, 4°C, for 5 min,  
243 discarding the supernatant fraction. Cell pellets were suspended in 0.3 ml a solution of  
244 10 mM pH 8.0 Tris-HCl and 10 mg lysozyme/ml (Sigma-Aldrich) and incubated at 37°C  
245 for 1 hr. TRIzol (Thermo Fisher Scientific) (1 ml) was added followed by 0.2 ml cold  
246 chloroform and incubation was continued at room temperature for 2-3 min, then  
247 centrifuged at 13,000 rpm, 4°C, for 20 min. After centrifugation, 0.4 ml of the resulting  
248 aqueous phase was added to 0.5 ml isopropanol and incubated at room temperature for  
249 10 min to precipitate RNA. The precipitant was washed with 75% ethanol, dried, and  
250 suspended in 50 µl DEPC-treated water. RNA quality was assessed by ethidium  
251 bromide-agarose gel electrophoresis.

252 **RT-PCR for transcription mapping experiments.** T1 RNA was treated with  
253 RNase-free DNaseI (Thermo Fisher Scientific) prior to being used for reverse  
254 transcriptase (RT)-PCR to eliminate residual genomic DNA; 50-100 ng RNA was used  
255 for each reaction. RT-PCR was carried out using gene-specific primers (Table 2) at a  
256 final concentration of 0.5 µM, using the SuperScript IV One-Step RT-PCR System  
257 (Thermo Fisher Scientific). Reactions were performed using a reverse transcription

258 step at 50°C for 10 min, a 2-min RT inactivation step at 98°C followed by 25-30 cycles  
259 at 98°C for 10 sec, 56°C for 10 sec, and 30 sec/kb at 72°C, with a final extension at  
260 72°C for 5 min. Each primer set (Table 2) was tested with T1 chromosomal DNA as  
261 template using *Taq* polymerase.

262 **β-Galactosidase assays.** Overnight cultures were used to inoculate 2216  
263 medium in sidearm flasks and cultures were grown at 37°C, 240 rpm, monitoring cell  
264 density at an OD<sub>600</sub>. Cells (1 ml) were harvested at mid-exponential (T<sub>-1</sub>), at the onset  
265 of stationary (T<sub>0</sub>), and 1-2 hours into stationary phase (T<sub>1</sub>), centrifuging at 10,000 x g,  
266 4°C, 5 min., and suspending cell pellets in 1 ml modified Z buffer (23). Sodium  
267 dodecylsulfate was added (final concentration 0.05%), vortexed, then incubated at  
268 37°C, 5 min, after which 0.2 ml of o-nitrophenyl-β-galactoside (4 mg/ml) was added,  
269 mixed, and incubated at 37°C for an additional 30 to 60 min. The reaction was stopped  
270 by the addition of 0.25 ml 2M sodium carbonate, vortexed, and placed on ice. After  
271 centrifugation at 10,000 x g at room temperature for 10 min., the OD at 420 nm was  
272 measured. Specific activity is given as nmoles/min/OD<sub>600</sub>.

273 **Statistical analysis.** Analysis of the data was performed using one-way  
274 analysis of variance (ANOVA) with the significance level of 0.01 (p < .01).

275

## 276 RESULTS

277       **Assessing T1 inhibitory activity.** Using the soft-agar overlay assay, T1 was  
278 shown to inhibit growth of three strains of *Vibrio parahaemolyticus*— AHPND-causing  
279 strains D4 (Fig 1A), isolated from Mexico, and A3 (Fig. 1B), isolated from Viet Nam, as  
280 well as a non-AHPND strain, ATCC 17802 (Fig. 1C, left)—which is evident by the zone  
281 of clearance around the T1 colony. Because chloroform is toxic to T1, the growth  
282 inhibition observed for the *Vibrio* strains applied in the soft agar over the T1 colony is a  
283 consequence of the accumulation of a diffusible substance produced by T1. In contrast,  
284 SMY, which is a *B. subtilis* subsp. *subtilis* strain (24), did not inhibit growth of any of the  
285 three strains (Fig. 1, right), highlighting a difference between *inaquosorum* and *subtilis*  
286 subspecies. Because strain D4 was more sensitive to T1 than A3, based on the size of  
287 the clearance zone, we used D4 as the test strain for subsequent studies.

288       The ability of T1 to effect D4 was examined further by co-culturing the two strains  
289 and monitoring D4 levels by measuring *toxR* copy number (see Methods). For these  
290 growth experiments, overnight cultures of D4 were diluted to  $2 \times 10^4$  CFU/ml and  
291 combined with overnight cultures of strain T1g diluted to final densities of  $2 \times 10^4$ ,  $2 \times$   
292  $10^5$  and  $2 \times 10^6$  CFU/ml (1:1, 10:1, and 100:1, T1g to D4, respectively) in 2216 broth, as  
293 described in Methods; the control culture did not contain T1g. After 3 hr and 24 hr,  
294 samples were collected, and DNA was extracted for qPCR analysis. At 3 hr, *toxR* levels  
295 did not vary significantly for any of the treatments (Table 3). At 24 hr, levels increased  
296 approx.  $10^3$ - to  $10^4$ -fold for control and cultures supplemented with T1g at the 1:1 and  
297 10:1 ratio. On the other hand, D4 *toxR* levels in the 24 hr culture containing T1g at the  
298 100:1 ratio was between 750- to 1250-fold lower compared to control (no T1g) and the

299 other T1-supplemented cultures and increased only approx. 70-fold compared to its 3 hr  
300 time point (Table 3). At 24 hr, T1g levels (measuring *gfp* copy number) were not  
301 significantly different for all T1-containing cultures, varying between  $6 \times 10^7 \pm 1.1 \times 10^7$   
302 copies/ml for the 1:1 culture to  $1.6 \times 10^8 \pm 0.6 \times 10^8$  copies/ml for the 100:1 culture. Thus,  
303 while T1g levels reached similar cell densities for all three treatments, D4 growth  
304 inhibition by T1g could be observed but only when present at a 100-fold excess,  
305 suggesting a relationship between inhibitor and culture density as well as an ability for  
306 D4 to overcome the inhibition.

307         A scenario that could explain the density-dependent activity observed for the co-  
308 culture experiments, which would be consistent with the production of a diffusible  
309 substance, as inferred from the overlay assay, is that T1 produces and secretes a D4-  
310 sensitive product that accumulates during late exponential and/or stationary phase,  
311 similar to other *B. subtilis* species. To test this possibility, supernatant fractions from 18  
312 hr T1 cultures grown in 2216 broth were filtered and mixed with equal volumes of  
313 overnight D4 cultures freshly diluted into 2216, monitoring D4 growth as described in  
314 Methods. As shown in Fig. 2, while all cultures grew to a similar final density, growth of  
315 the D4 culture supplemented with the T1 cell-free supernatant was delayed for 5 to 6 hr,  
316 compared to the D4 control, while no delay was observed for the culture treated with a  
317 cell-free supernatant from an overnight D4 culture. D4 *toxR* levels for the T1  
318 supernatant-treated culture were approx.  $3 \times 10^5$ -fold lower compared to the untreated  
319 D4 culture (Table 4), 5.5 hr after inoculation. On the other hand, D4 levels in the D4  
320 culture treated with its own supernatant declined only approx. 10-fold (Table 4),  
321 indicating that inhibition was due to a factor specifically produced by T1 and not likely

322 due to exhaustion of nutrients in the spent medium. Inhibition was also found to be  
323 concentration-dependent since addition of T1 cell-free supernatant at 25% resulted in  
324 an approx. 2 hour lag (not shown). D4 growth was not affected when cell-free  
325 supernatants were prepared from mid-exponential T1 cultures (not shown).

326 **Identification of T1 genes involved in D4 inhibitory activity.** To determine  
327 the genetic basis for the T1 inhibitory activity we generated a transposon insertion  
328 library using the *mariner*-derived *himar1* transposase as described in Methods. Over  
329 3,000 transposon-containing mutants were screened for loss of T1 inhibitory activity by  
330 the overlay assay. Seventeen mutants were identified as having complete or partial  
331 loss of activity against D4 and insertion site locations could be identified for 16 of these  
332 mutants, which are listed in Table 5; overlay assays for mutants A2-18 (partial loss), A3-  
333 41, A11-79 and A20-86 (full loss) are shown in Fig. 3. Insertion sites for 13 mutants  
334 were found clustered in seven open reading frames within a 42.6 kb region of DNA  
335 positioned between the *pcrA-ligA* operon and *phoA* at 5' and 3' ends (Table 5 and Fig.  
336 4), respectively, unique to the *inaquosorum* and *stercoris* subspecies of *B. subtilis* (18).  
337 BLASTp analysis revealed that the deduced *orfA*, *orfB*, and *orfC* products containing  
338 peptide synthesis, condensation, adenylation, and acyl carrier domains conserved  
339 among non-ribosomal peptide synthetases (NRPSs). Domains conserved among type I  
340 polyketide synthases (PKSs), including kedoreductase, ketoacyl synthase, and acyl  
341 transferase, were evident for *orfD*, *orfE* and *orfF* products. Furthermore, homologies  
342 were found to *B. subtilis* proteins involved in antimicrobial peptide and polyketide  
343 synthesis for the other open reading frame products including major facilitator  
344 superfamily (MFS) transporter (*orf2*), endopeptidase processing enzyme (*orf3*),



345 thioesterase (*grsT*), acyl CoA dehydrogenases (*orf5* and *orf8*), and acyl carrier protein  
346 (*orf7*) (Fig. 4). The DNA sequence of this region was deposited in GenBank, accession  
347 number MT366812.

348 In addition to evaluating mutant activities using the overlay assay, we examined  
349 the activity of mutant A3-41, grown in co-culture with D4 at a 1:1, 10:1 and 100:1 ratio.  
350 This mutant contains an insertion in the NRPS-like *orfB* gene, about halfway into the  
351 NRPS-PKS region (Table 5 and Fig. 4). Consistent with the overlay assay results, A3-  
352 41 did not significantly affect D4 levels at either the 3 hr or 24 hr timepoints (Table 3)  
353 when included at any ratio. Furthermore, the cell-free supernatant prepared from A3-41  
354 did not delay D4 growth like its wild-type T1 parent (Fig. 2) and D4 levels at 5.5 hr after  
355 inoculation in the presence of the A3-41 cell-free supernatant were comparable to the  
356 control D4 culture (Table 4). At 24 hr, A3-41 levels (*amyE* copy number) were not  
357 significantly different and were similar to T1g levels, varying between  $2.4 \times 10^8 \pm 0.5 \times 10^8$   
358 copies/ml for the 1:1 culture to  $4.7 \times 10^8 \pm 1.2 \times 10^8$  copies/ml for the 100:1 culture. Thus,  
359 loss of inhibitory activity was directly due to elimination of the *orfB* product and  
360 consistent with a role for the NRPS-PKS region in producing the anti-D4 activity.

361 Mutants with insertions outside of the NRPS-PKS cluster were also found,  
362 including within *spo0A* (mutant A8-11, Table 5), the master transcriptional regulator  
363 required for activating early sporulation and early stationary phase genes (25), and  
364 *oppA* (mutant A2-18, Table 5). Also known as *spo0K*, *oppA* is the first gene of a five-  
365 gene operon responsible for synthesis of the oligopeptide-binding protein an ABC-  
366 transporter that plays a role in a variety of stationary phase activities, including initiation  
367 of sporulation and competence development (26). In both cases, gene disruption

368 resulted in partial loss of D4 inhibitory activity (Fig. 3 and not shown). Mutant S31-22  
369 (Table 5), which was also defective in D4 inhibitory activity, contained an insertion in  
370 *yoaZ* (BSU17890), a putative oxidative stress response factor whose function is unclear  
371 (27).

372       **Transcription mapping of the NRPS-PKS region.** RNA extracted from mid-  
373 exponential and early stationary phase cultures of T1 grown in 2216 broth was  
374 examined by RT-PCR, as described in Methods. Primers were designed to target  
375 amino and carboxyl termini of consecutive predicted ORFs (Table 2). Regions  
376 spanning all 17 predicted ORFs in the NRPS-PKS region were tested as well as the  
377 adjacent upstream *pcrA* operon and downstream *phoA* gene. Amplification of cDNA  
378 generated from both mid-exponential (not shown) and stationary-phase (Fig. 5) RNA  
379 was observed for the entire NRPS-PKS region spanning from *orf2* to *orf9*, indicating that  
380 the entire 42.6 kb region encompassed a single transcription unit. No amplification  
381 products were observed for the *orf1-orf2* and *orf9-phoA* regions (Fig. 5), signifying the  
382 absence of a transcript spanning these genes and demarcating the 5' and 3' ends of the  
383 NRPS-PKS region transcriptional unit at *orf2* and *orf9*, respectively. The absence of a  
384 product between *orf9* and *phoA* was expected since *phoA* is expressed in a direction  
385 opposite of the NRPS-PKS region. Both *orf9* and *phoA* stop codons are followed by  
386 sequences that could form 25 and 27 b mRNA hairpin structures ( $\Delta G = -17$  kcal/mol for  
387 both, determined using the Vienna RNA Websuite (28)) with U-rich ends, which likely  
388 act as transcription terminators. Similarly, *pcrA*, *ligA* and *orf1* are part of a four-gene  
389 operon—*pcrA* is preceded by *pcrB* and *orf1* (referred to as *yerH* by Petit et al. (29))—  
390 with a transcription terminator found after *orf1* (see below), so co-transcription of *orf1-*

391 *orf2* was not anticipated.

392       **Control of NRPS-PKS gene expression.** Several transposon mutants were  
393 obtained using plasmid pEP4, which, upon insertion, resulted in the creation of a  
394 transcriptional fusion with *lacZ*, thereby enabling the analysis of gene expression during  
395 growth and stationary phase.  $\beta$ -Galactosidase levels were determined for four mutants,  
396 A20-86, A3-41, A11-79 and A1-20, containing fusions with *orfA*, *orfB*, *orfC* and *orfD*,  
397 respectively (Table 1). These mutants were grown in 2216 broth and harvested at mid-  
398 exponential ( $T_{-1}$ ), at the transition into stationary phase ( $T_0$ ), and 1-2 hrs into stationary  
399 phase ( $T_1$ ) and results are shown in Table 6. During mid-exponential growth,  $\beta$ -  
400 galactosidase levels were similar for all four strains and did not fluctuate significantly  
401 compared to background levels obtained for wild-type T1g, which does not possess  
402 *lacZ*. Once cultures entered stationary phase, *lacZ* expression increased between 17-  
403 to 42-fold compared to their  $T_{-1}$  basal levels and were elevated an additional 50% 1-2  
404 hrs into stationary phase. Thus, expression of NRPS-PKS genes are linked to  
405 stationary phase processes, consistent with the isolation of mutants in stationary phase  
406 regulator genes.

407       **The *orf1-orf2* intergenic region.** Examination of the 117 bp region between  
408 *orf1* and *orf2* revealed several potential promoter and regulatory sequences. We  
409 identified a sequence adjacent to the predicted *orf1* stop codon having the capacity to  
410 form a 30 b mRNA hairpin structure ( $\Delta G = -21$  kcal/mol) followed by several consecutive  
411 Us, which likely serve as a transcription terminator (Fig. 6). Sequences between 36 and  
412 57 bp upstream from the *orf2* initiation codon (Fig. 6) were similar to  $\sigma^A$  (30) and  $\sigma^H$  (31)  
413 consensus sequences and may be used for *orf2* transcription initiation. The loss of D4

414 inhibiting activity by strain SSh1 (Fig. 3), which contains an insertion in *sigH*, the  $\sigma^H$   
415 structural gene, supports involvement of  $\sigma^H$  in NRPS-PKS gene expression. Similarly,  
416 the partial loss of inhibiting activity observed for *spo0A* mutant A8-11 in the overlay  
417 assay also indicates a role for Spo0A in activating NRPS-PKS expression. A putative  
418 *spo0A* binding site was identified 71 bp upstream of the  $\sigma^A$  and  $\sigma^H$  consensus  
419 sequences, overlapping the last two *orf1* codons; this sequence includes internal G and  
420 C residues critical for Spo0A binding (25) (Fig. 6). The location of this site could allow  
421 for Spo0A-dependent activation of either  $\sigma^H$  or  $\sigma^A$  polymerases.

422       **Involvement of AbrB on NRPS-PKS expression.** AbrB is a key transitional  
423 phase regulator controlling expression of more than 100 stationary phase genes  
424 including those involved in antibiotic production (32). To examine a role for AbrB in  
425 NRPS-PKS expression, we constructed *abrB* mutant SSb1(*abrB::erm*). Like its parent  
426 T1, SSb1 was found to inhibit D4 growth using the overlay assay (Fig. 3). A cell-free  
427 supernatant prepared from a stationary phase SSb1 culture delayed D4 growth approx.  
428 22 hr, four-fold longer than the delay observed for the T1 supernatant (Fig. 7).  
429 Furthermore,  $\beta$ -galactosidase activity of *abrB* mutant A20-86A (*orfA::lacZ*) was 52-fold  
430 higher during mid-exponential ( $T_{-1}$ ) than strain A20-86, its *abrB*<sup>+</sup> parent, and comparable  
431 to the elevated levels observed for transition ( $T_0$ ) and stationary phases ( $T_1$ ) (Table 6).  
432 Therefore, AbrB plays a role in controlling NRPS-PKS expression.

## 433 DISCUSSION

434 Our preliminary studies showed that *B. subtilis* strain T1 inhibited growth of VirAP  
435 toxin-producing *V. parahaemolyticus* (Avery, Hise, and Schreier, unpublished). Analysis  
436 of the T1 genome revealed that it is a member of the *inaquosorum* subspecies of *B.*  
437 *subtilis* (Schreier, unpublished), which is distinguishable from *subtilis* and *spizizinii*  
438 subspecies by a 42.6 kb DNA region having the capacity to encode NRPSs and PKSs  
439 (18). In the present study we used transposon mutagenesis to determine that this  
440 region is responsible for producing the inhibitory activity and results from overlay assays  
441 and cell-free culture supernatant experiments indicates that this activity is a secreted  
442 stationary phase product whose synthesis is under control of key stationary phase  
443 regulators. To our knowledge, this is the first study that examines expression and  
444 control of an antibacterial compound from the NRPS-PKS region unique to the  
445 *inaquosorum* and *stercoris* subspecies of *B. subtilis* (18).

446 Synthesis and secretion of antimicrobial compounds by members of the genus  
447 *Bacillus* during the transition to stationary and early stationary phase is one strategy  
448 used by this group of bacteria to compete with other organisms for reduced resources  
449 as a prelude to sporulation (33). The elevated expression observed for NRPS-PKS  
450 genes by T1 during these periods (Table 6) is consistent with this strategy and, with the  
451 the low or negligible expression during growth, can explain results for the D4 and T1 co-  
452 culture experiments. During exponential growth (i.e., 3 hr after inoculation), the inability  
453 to inhibit D4 growth by any of the T1 treatments is likely the consequence of low level  
454 inhibitor production during this period. Throughout the subsequent 21 hrs, however, the  
455 entry of T1 cultures into late exponential and stationary phase resulted in as much as a

456 62-fold increase in NRPS-PKS gene expression (e.g., for strain A20-86, Table 6) with  
457 the accompanying synthesis and accumulation of inhibitor. This resulted in a 700- to  
458 1200-fold decrease in D4 levels observed for growth in the presence of 100-fold excess  
459 T1 (Table 3). On the other hand, the absence of inhibition observed for D4 in co-  
460 cultures of T1 at 1:1 and 10:1 ratios could be explained by differences in generation  
461 times between D4 and T1 in 2216 broth, which are 40 and 60 min, respectively. For  
462 these cultures, D4 likely outgrew and attained stationary before T1 accumulated  
463 sufficient inhibitor required to influence D4 growth. Furthermore, at the 1:1 and 10:1  
464 ratios, D4 may be able to mitigate the effect of inhibitor, as was observed by its ability to  
465 resume growth after treatment with cell-free T1 culture supernatants (see below).

466 Evidence that D4 was sensitive to a product of the NRPS-PKS region was  
467 obtained from overlay, co-culture, and cell-free supernatant experiments, since  
468 inhibition did not occur using mutants containing insertions within NRPS-PKS region  
469 genes. Moreover, the inability of cell-free supernatants from *orfB* mutant A3-41 to  
470 inhibit D4 growth indicated that the effect was directly due to *orfB* and downstream  
471 genes and not a consequence of a toxic stationary phase byproducts, e.g., volatile  
472 organic or inorganic compounds (34), or nutrient depletion of the spent medium. While  
473 *B. subtilis* subsp. *inaquosorum* is capable of synthesizing lipopeptides bacillomycin F  
474 and fengycin (18), growth of *V. parahaemolyticus* strains A3, D4, and ATCC 17802  
475 occurred in the presence of both T1 NRPS-PKS mutants as well as strain SMY, a *B.*  
476 *subtilis* subsp. *subtilis* that also produces these secondary products, arguing that neither  
477 of these nonribosomal peptides are involved in T1 inhibitory activity.

478 Transcript mapping indicated that the NRPS-PKS region encodes one

479 polycistronic message extending across all 15 genes forming an operon, although our  
480 analyses cannot rule out the possibility that transcription of a subset of these genes  
481 might occur from internal promoters. The absence of a transcript spanning *orf1* and  
482 *orf2* indicated that initiation likely occurs from the first gene of the operon, *orf2*, and  
483 requires  $\sigma^H$  for activity (based on results for the overlay assay of *sigH* mutant SSh1, Fig.  
484 3), which may bind to sequences upstream of *orf2* (Fig. 6). Recent RT-PCR studies  
485 have detected NRPS-PKS mRNA in stationary phase cultures of strain SSh1  
486 (Ruzbarsky, unpublished), suggesting the involvement of another polymerase for  
487 transcription. One candidate is  $\sigma^A$  since consensus  $\sigma^A$  promoter sequences were found  
488 to overlap the putative  $\sigma^H$  promoter (Fig. 6), and would provide a mechanism for NRPS-  
489 PKS expression during exponential growth. Promoters transcribed using both sigma  
490 factors under different physiological conditions in *B. subtilis* have been noted (31, 35).

491         Similar to many *B. subtilis* stationary phase products and processes (33), the  
492 NRPS-PKS genes of T1 were found to be under control of *oppA*, *spo0A* and *abrB*,  
493 genes encoding transitional and stationary phase regulators. Disruption of *oppA*—  
494 mutant A2-18—the first gene of the *opp* operon, resulted in loss of inhibitory activity.  
495 This operon encodes an oligopeptide permease that functions as a receptor in  
496 signaling (26, 36) and impairment of *oppA* results in loss of bacilysin production (37), a  
497 nonribosomally synthesized antimicrobial. The *opp* operon is linked to the ComA  
498 competence response regulator and CSF (PhrC), the competence and sporulation  
499 factor, which also participates in *B. subtilis* quorum-sensing (36). When CSF  
500 accumulates extracellularly due to high cell density, production of bacilysin is stimulated  
501 (38). Any involvement of the Com system or CSF in control of NRPS-PKS expression

502 through *oppA* is yet to be determined.

503 Isolation of a mutant with an insertion in *spo0A*—A8-11—having decreased  
504 inhibitory activity indicated a role for this regulator in NRPS-PKS control. The *spo0A*  
505 gene product, Spo0A, is a master transcriptional regulator of early stationary phase  
506 processes, including NRPS and PKS gene activation, and development of spores (39).  
507 In its phosphorylated state, Spo0A activates transcription initiation at both  $\sigma^A$  and  $\sigma^H$   
508 promoters and is responsible for indirectly activating *sigH* transcription by repressing  
509 AbrB, the global transition state regulator (33, 39). While we did not address the nature  
510 of Spo0A participation on NRPS-PKS expression, we identified a putative Spo0A  
511 binding site upstream of *orf2* that could be used to activate  $\sigma^H$ - and, possibly,  $\sigma^A$ -  
512 dependent transcription. Whether Spo0A is directly involved in activating NRPS-PKS  
513 transcription or indirectly by elevating  $\sigma^H$  levels remains to be established.

514 Like Spo0A, AbrB is essential for controlling NRPS-PKS expression as *orfA*  
515 expression in *abrB* mutant A20-86-A was found to be 52-fold elevated during  
516 exponential growth compared to its parent A20-86 (*abrB*<sup>+</sup>) strain (Table 6). Elevated  
517 activity was also found for cell-free supernatant fractions prepared from the *abrB*  
518 mutant, SSb1 (Fig. 7). Involvement of AbrB in controlling NRPS and PKS genes in  
519 *Bacillus* spp. is well documented, and can act by binding either directly to promoter  
520 sequences, interfering with transcription initiation, or indirectly through repression of  
521 *sigH* (33). While the A/T-rich character of the *orf2* promoter is typical of AbrB binding  
522 sites, TGGNA and TNCCA motifs associated with AbrB (40) are absent.

523 How is *V. parahaemolyticus* affected by the T1 inhibitor? The mode of action  
524 of many *Bacillus* spp. NRPS- and PKS-derived antimicrobials is through membrane



525 perturbation or depolarization (15), e.g., fengycin (41) and iturin A (42), blockage of  
526 peptidoglycan biosynthesis, e.g., bacilysin (34), or selective inhibition of protein  
527 synthesis, e.g., difficidin (34). Regardless of mechanism, both co-culture and cell-free  
528 supernatant experiments demonstrated that D4 was capable of overcoming the T1  
529 NRPS-PKS inhibitory activity, with growth levels reaching those obtained for untreated  
530 cultures. Along with D4, the bacteriostatic nature of the T1 inhibitor was also observed  
531 for A3 and ATCC 17802 strains, which produced small colonies in overlay assay  
532 clearance zones after long-term incubation (Schreier, unpublished). Isolates obtained  
533 from these zones continued to remain sensitive to T1 (Schreier, unpublished),  
534 suggesting an ability to either degrade the inhibitor—*Vibrio* spp. secrete several classes  
535 of proteases, some of which may have activities against lipopeptides (43)—or modify  
536 their membrane components to be less sensitive to inhibitor activity as part of an  
537 induced stress response (44). The increased sensitivity of A3 to T1 inhibition compared  
538 to D4 and ATCC 17802 in the overlay assay might be explained by increased activities  
539 for either of these processes. While little is known about stability and persistence of  
540 NRPS and PKS products in the environment, it is also possible that factors other than  
541 enzymatic degradation, e.g., pH and media components, may decrease their efficacy  
542 over time (45).

543         The use of *Bacillus* spp. as biological control agents has received a substantial  
544 amount of attention due to their antimicrobial characteristics and safety (13, 46) along  
545 with their spore-forming capability, which is advantageous for long-term storage (47). *B.*  
546 *subtilis* strains have been effective in controlling disease outbreaks due to *Vibrio*  
547 pathogens in a variety of aquaculture species, including shrimp (48-50), in addition to

548 providing probiotic benefits (13). The ability of *B. subtilis* strain T1 to inhibit growth of  
549 AHPND *Vibrio* spp. suggested its potential for use as a tool in the prevention and  
550 treatment of AHPND in shrimp aquaculture. Understanding the genetic basis of the  
551 inhibitory activity and its regulatory mechanisms allows for the development of T1  
552 strains having desirable properties such as enhanced NRPS-PKS expression during  
553 growth that was acquired by disabling *abrB*. Such strains could be used in aquaculture  
554 applications to complement other strains having different antimicrobial activities. Our  
555 preliminary studies have shown that daily addition of freshly prepared cell-free SSb1  
556 supernatants to D4 cultures resulted in continuous cessation of D4 growth over the  
557 course of a 72 hour treatment (Avery, Ruzbarsky and Schreier, unpublished). Thus,  
558 supplementing feed with *abrB* mutant SSb1 might provide system water and animal  
559 microbiomes with a constant source of inhibitory activity, bypassing stability or  
560 degradation issues and restricting the growth of pathogen before they reach virulent  
561 levels. Studies aimed at evaluating T1 and its derivatives to protect against AHPND  
562 *Vibrio* in shrimp aquaculture systems are ongoing.

563 **AUTHOR CONTRIBUTIONS**

564 SA, SR and HS conceived the project and designed the research. HS  
565 supervised the study. SA, SR, AH and HS contributed to the investigation, methodology  
566 and data analysis. SA, SR and HS prepared figures, wrote, reviewed and edited the  
567 paper. All authors reviewed and approved the final manuscript.

568 **ACKNOWLEDGEMENTS**

569 This work was supported, in part, by grants from Epicore Networks  
570 (U.S.A.) Inc. and G. Unber Vetlesen Foundation. The authors thank Julie Wolf, Dr. Eric  
571 Schott and Dr. Russell Jerusik for helpful comments and Sabeena Nazar, Bioanalytical  
572 Services Lab, Institute of Marine and Environmental Technology, for DNA sequencing.

573 **REFERENCES**

- 574 1. Li P, Kinch LN, Ray A, Dalia AB, Cong Q, Nunan LM, Camilli A, Grishin NV,  
575 Salomon D, Orth K. 2017. Acute hepatopancreatic necrosis disease (AHPND)-  
576 causing *Vibrio parahaemolyticus* strains maintain an antibacterial type VI  
577 secretion system with versatile effector repertoires. *Appl Env Microbiol*  
578 doi:10.1128/AEM.00737-17:00737.
- 579 2. Dhar AK, Piamsomboon P, Caro LFA, Kanrar S, Adami Jr R, Juan Y-S. 2019.  
580 First report of acute hepatopancreatic necrosis disease (AHPND) occurring in the  
581 USA. *Dis Aquatic Org* 132:241-247.
- 582 3. Soto-Rodriguez SA, Gomez-Gil B, Lozano-Olvera R, Betancourt-Lozano M,  
583 Morales-Covarrubias MS. 2015. Field and experimental evidence of *Vibrio*  
584 *parahaemolyticus* as the causative agent of acute hepatopancreatic necrosis  
585 disease of cultured shrimp (*Litopenaeus vannamei*) in Northwestern Mexico. *Appl*  
586 *Env Microbiol* 81:1689-1699.
- 587 4. Lee C-T, Chen I-T, Yang Y-T, Ko T-P, Huang Y-T, Huang J-Y, Huang M-F, Lin S-  
588 J, Chen C-Y, Lin S-S. 2015. The opportunistic marine pathogen *Vibrio*  
589 *parahaemolyticus* becomes virulent by acquiring a plasmid that expresses a  
590 deadly toxin. *Proc Natl Acad Sci USA* 112:10798-10803.
- 591 5. Dong X, Bi D, Wang H, Zou P, Xie G, Wan X, Yang Q, Zhu Y, Chen M, Guo C.  
592 2017. *pirABvp*-Bearing *Vibrio parahaemolyticus* and *Vibrio campbellii* pathogens  
593 isolated from the same AHPND-affected pond possess highly similar pathogenic  
594 plasmids. *Front Microbiol* 8:1859.

- 595 6. Lin S-J, Hsu K-C, Wang H-C. 2017. Structural Insights into the cytotoxic  
596 mechanism of *Vibrio parahaemolyticus* PirAvp and PirBvp Toxins. Mar Drugs  
597 15:373.
- 598 7. Lai H-C, Ng TH, Ando M, Lee C-T, Chen I-T, Chuang J-C, Mavichak R, Chang S-  
599 H, Yeh M-D, Chiang Y-A. 2015. Pathogenesis of acute hepatopancreatic  
600 necrosis disease (AHPND) in shrimp. Fish Shellfish Immunol 47:1006-1014.
- 601 8. Watts JE, Schreier HJ, Lanska L, Hale MS. 2017. The rising tide of antimicrobial  
602 resistance in aquaculture: sources, sinks and solutions. Mar Drugs 15:158.
- 603 9. Chen W-Y, Ng TH, Wu J-H, Chen J-W, Wang H-CJSr. 2017. Microbiome  
604 dynamics in a shrimp grow-out pond with possible outbreak of acute  
605 hepatopancreatic necrosis disease. Sci Rep 7:9395.
- 606 10. De Schryver P, Defoirdt T, Sorgeloos P. 2014. Early mortality syndrome  
607 outbreaks: a microbial management issue in shrimp farming? PLoS Pathog  
608 10:e1003919.
- 609 11. Skjermo J, Salvesen I, Øie G, Olsen Y, Vadstein O. 1997. Microbially matured  
610 water: a technique for selection of a non-opportunistic bacterial flora in water that  
611 may improve performance of marine larvae. Aquacult Int 5:13-28.
- 612 12. Defoirdt T, Sorgeloos P, Bossier P. 2011. Alternatives to antibiotics for the  
613 control of bacterial disease in aquaculture. Curr Opin Microbiol 14:251-258.
- 614 13. Kuebutornye FK, Abarike ED, Lu Y. 2019. A review on the application of *Bacillus*  
615 as probiotics in aquaculture. Fish Shellfish Immunol 87:820-828.
- 616 14. Dawood MA, Koshio S, Abdel-Daim MM, Van Doan H. 2019. Probiotic  
617 application for sustainable aquaculture. Rev Aquacult 11:907-924.

- 618 15. Kaspar F, Neubauer P, Gimpel M. 2019. Bioactive secondary metabolites from  
619 *Bacillus subtilis*: a comprehensive review. J Nat Prod 82:2038-2053.
- 620 16. Aleti G, Sessitsch A, Brader G. 2015. Genome mining: prediction of lipopeptides  
621 and polyketides from *Bacillus* and related Firmicutes. Comput Struct Biotechnol J  
622 13:192-203.
- 623 17. Avery SE. 2018. A study of the antagonistic activity of *Bacillus subtilis* strain T1  
624 against shrimp pathogen *Vibrio parahaemolyticus* strain D4. Masters of Science.  
625 University of Maryland Baltimore County, Baltimore, MD.
- 626 18. Dunlap CA, Bowman MJ, Zeigler DR. 2020. Promotion of *Bacillus subtilis* subsp.  
627 *inaquosorum*, *Bacillus subtilis* subsp. *spizizenii* and *Bacillus subtilis* subsp.  
628 *stercoris* to species status. Antonie van Leeuwenhoek 113:1-12.
- 629 19. Sambrook J, Fritsch F, Maniatis T. 1989. Molecular cloning: A laboratory manual.  
630 Cold Spring Harbor Laboratory Press, Cold Spring Harbor, NY.
- 631 20. Pozsgai ER, Blair KM, Kearns DB. 2011. Modified mariner transposons for  
632 random inducible-expression insertions and transcriptional reporter fusion  
633 insertions in *Bacillus subtilis*. Appl Environ Microbiol 78:778-785.
- 634 21. Altschul SF, Gish W, Miller W, Myers EW, Lipman DJ. 1990. Basic local  
635 alignment search tool. J Mol Biol 215:403-410.
- 636 22. Altschul SF, Madden TL, Schäffer AA, Zhang J, Zhang Z, Miller W, Lipman DJ.  
637 1997. Gapped BLAST and PSI-BLAST: a new generation of protein database  
638 search programs. Nuc Acids Res 25:3389-3402.

- 639 23. Schreier HJ, Rostkowski CA, Nomellini JF, Hirschi KD. 1991. Identification of  
640 DNA Sequences involved in regulating *Bacillus subtilis glnRA* expression by the  
641 nitrogen source. *J Mol Biol* 220:241-253.
- 642 24. Zeigler DR, Prágai Z, Rodriguez S, Chevreux B, Muffler A, Albert T, Bai R, Wyss  
643 M, Perkins JB. 2008. The origins of 168, W23, and other *Bacillus subtilis* legacy  
644 strains. *J Bacteriol* 190:6983-6995.
- 645 25. Molle V, Fujita M, Jensen ST, Eichenberger P, González-Pastor JE, Liu JS,  
646 Losick R. 2003. The Spo0A regulon of *Bacillus subtilis*. *Mol Microbiol* 50:1683-  
647 1701.
- 648 26. Rudner DZ, LeDeaux JR, Ireton K, Grossman AD. 1991. The spo0K locus of  
649 *Bacillus subtilis* is homologous to the oligopeptide permease locus and is  
650 required for sporulation and competence. *J Bacteriol* 173:1388-1398.
- 651 27. Koo B-M, Kritikos G, Farelli JD, Todor H, Tong K, Kimsey H, Wapinski I,  
652 Galardini M, Cabal A, Peters JM. 2017. Construction and analysis of two  
653 genome-scale deletion libraries for *Bacillus subtilis*. *Cell Systems* 4:291-305. e7.
- 654 28. Gruber AR, Lorenz R, Bernhart SH, Neuböck R, Hofacker IL. 2008. The Vienna  
655 RNA websuite. *Nuc Acids Res* 36:W70-W74.
- 656 29. Petit M-A, Ehrlich SD. 2000. The NAD-dependent ligase encoded by *yerG* is an  
657 essential gene of *Bacillus subtilis*. *Nuc Acids Res* 28:4642-4648.
- 658 30. Haldenwang WG. 1995. The sigma factors of *Bacillus subtilis*. *Microbiol Rev*  
659 59:1-30.

- 660 31. Britton RA, Eichenberger P, Gonzalez-Pastor JE, Fawcett P, Monson R, Losick  
661 R, Grossman AD. 2002. Genome-wide analysis of the stationary-phase sigma  
662 factor (sigma-H) regulon of *Bacillus subtilis*. J Bacteriol 184:4881-4890.
- 663 32. Strauch MA, Hoch JA. 1993. Transition-state regulators: sentinels of *Bacillus*  
664 *subtilis* post-exponential gene expression. Mol Microbiol 7:337-342.
- 665 33. Phillips Z, Strauch M. 2002. *Bacillus subtilis* sporulation and stationary phase  
666 gene expression. Cell Mol Life Sci 59:392-402.
- 667 34. Caulier S, Nannan C, Gillis A, Licciardi F, Bragard C, Mahillon J. 2019. Overview  
668 of the antimicrobial compounds produced by members of the *Bacillus subtilis*  
669 group. Front Microbiol 10:302.
- 670 35. Yang S, Du G, Chen J, Kang Z. 2017. Characterization and application of  
671 endogenous phase-dependent promoters in *Bacillus subtilis*. Appl Microbiol  
672 Biotechnol 101:4151-4161.
- 673 36. Lazazzera BA, Solomon JM, Grossman AD. 1997. An exported peptide functions  
674 intracellularly to contribute to cell density signaling in *B. subtilis*. Cell 89:917-925.
- 675 37. Yazgan A, Özcengiz G, Marahiel MA. 2001. Tn10 insertional mutations of  
676 *Bacillus subtilis* that block the biosynthesis of bacilysin. Biochim Biophys Acta-  
677 Gene Structure and Expression 1518:87-94.
- 678 38. Köroğlu TE, Ögülür İ, Mutlu S, Yazgan-Karataş A, Özcengiz G. 2011. Global  
679 regulatory systems operating in bacilysin biosynthesis in *Bacillus subtilis*. J Mol  
680 Microbiol Biotechnol 20:144-155.



- 681 39. Fawcett P, Eichenberger P, Losick R, Youngman P. 2000. The transcriptional  
682 profile of early to middle sporulation in *Bacillus subtilis*. Proc Natl Acad Sci USA  
683 97:8063-8068.
- 684 40. Chumsakul O, Takahashi H, Oshima T, Hishimoto T, Kanaya S, Ogasawara N,  
685 Ishikawa S. 2011. Genome-wide binding profiles of the *Bacillus subtilis* transition  
686 state regulator AbrB and its homolog Abh reveals their interactive role in  
687 transcriptional regulation. Nuc Acids Res 39:414-428.
- 688 41. Zakharova AA, Efimova SS, Malev VV, Ostroumova OS. 2019. Fengycin induces  
689 ion channels in lipid bilayers mimicking target fungal cell membranes. Sci  
690 Reports 9:1-10.
- 691 42. Gao X-Y, Liu Y, Miao L-L, Li E-W, Sun G-x, Liu Z-P. 2017. Characterization and  
692 mechanism of anti-*Aeromonas salmonicida* activity of a marine probiotic strain,  
693 *Bacillus velezensis* V4. Appl Microbiol Biotechnol 101:3759-3768.
- 694 43. Steinbuch KB, Fridman M. 2016. Mechanisms of resistance to membrane-  
695 disrupting antibiotics in Gram-positive and Gram-negative bacteria. Med Chem  
696 Comm 7:86-102.
- 697 44. Lima TB, Pinto MFS, Ribeiro SM, de Lima LA, Viana JC, Júnior NG, de Souza  
698 Cândido E, Dias SC, Franco OL. 2013. Bacterial resistance mechanism: what  
699 proteomics can elucidate. FASEB J 27:1291-1303.
- 700 45. Raaijmakers JM, De Bruijn I, Nybroe O, Ongena M. 2010. Natural functions of  
701 lipopeptides from *Bacillus* and *Pseudomonas*: more than surfactants and  
702 antibiotics. FEMS Microbiol Rev 34:1037-1062.

- 703 46. Harwood CR, Mouillon J-M, Pohl S, Arnau J. 2018. Secondary metabolite  
704 production and the safety of industrially important members of the *Bacillus*  
705 *subtilis* group. FEMS Microbiol Rev 42:721-738.
- 706 47. Hong HA, Duc le H, Cutting SM. 2005. The use of bacterial spore formers as  
707 probiotics. FEMS Microbiol Rev 29:813-835.
- 708 48. Interaminense JA, Vogeley JL, Gouveia CK, Portela RS, Oliveira JP, Silva SM,  
709 Coimbra MRM, Peixoto SM, Soares RB, Buarque DS. 2019. Effects of dietary  
710 *Bacillus subtilis* and *Shewanella algae* in expression profile of immune-related  
711 genes from hemolymph of *Litopenaeus vannamei* challenged with *Vibrio*  
712 *parahaemolyticus*. Fish Shellfish Immunol 86:253-259.
- 713 49. Zokaeifar H, Babaei N, Saad CR, Kamarudin MS, Sijam K, Balcazar JL. 2014.  
714 Administration of *Bacillus subtilis* strains in the rearing water enhances the water  
715 quality, growth performance, immune response, and resistance against *Vibrio*  
716 *harveyi* infection in juvenile white shrimp, *Litopenaeus vannamei*. Fish Shellfish  
717 Immunol 36:68-74.
- 718 50. Cheng A-C, Lin H-L, Shiu Y-L, Tyan Y-C, Liu C-H. 2017. Isolation and  
719 characterization of antimicrobial peptides derived from *Bacillus subtilis* E20-  
720 fermented soybean meal and its use for preventing *Vibrio* infection in shrimp  
721 aquaculture. Fish Shellfish Immunol 67:270-279.

722

723 **Table 1.** Bacterial strains used in this study.

| Strain     | Description                                                                                                            | Source or Reference            |
|------------|------------------------------------------------------------------------------------------------------------------------|--------------------------------|
| T1         | <i>Bacillus subtilis</i> subsp. <i>inaquosorum</i>                                                                     | Epicore Networks (U.S.A.) Inc. |
| SMY        | <i>Bacillus subtilis</i> subsp. <i>subtilis</i>                                                                        | Laboratory strain              |
| T1g        | <i>amyE::rrnA<sub>p</sub>-gfp</i> , T1 x AR13 DNA, Sp <sup>R</sup>                                                     | This study                     |
| SSh1       | <i>sigH::erm</i> , T1 x BKE00980 DNA, Em <sup>R</sup> Ln <sup>R</sup>                                                  | This study                     |
| SSb1       | <i>abrB::erm</i> , T1 x BKE00370 DNA, Em <sup>R</sup> Ln <sup>R</sup>                                                  | This study                     |
| AR13       | <i>amyE::rrnA<sub>p</sub>-gfp</i> Sp <sup>R</sup>                                                                      | BGSC                           |
| BKE00980   | <i>sigH::erm</i>                                                                                                       | BGSC                           |
| BKE00370   | <i>abrB::erm</i>                                                                                                       | BGSC                           |
| D4         | <i>Vibrio parahaemolyticus</i> isolate 13-306, PirAB                                                                   | (4)                            |
| A3         | <i>Vibrio parahaemolyticus</i> isolate 13-028, PirAB                                                                   | (4)                            |
| ATCC 17802 | <i>Vibrio parahaemolyticus</i>                                                                                         | James Kaper                    |
| A1-20      | <i>orfDΩTnLacJump (orfD::lacZ)</i> , Sp <sup>R</sup>                                                                   | This study                     |
| A2-18      | <i>oppAΩTnLacJump</i> , Sp <sup>R</sup>                                                                                |                                |
| A2-30      | <i>orfBΩTnLacJump</i> , Sp <sup>R</sup>                                                                                |                                |
| A3-41      | <i>orfBΩTnLacJump (orfB::lacZ)</i> , Sp <sup>R</sup>                                                                   |                                |
| A8-11      | <i>spo0AΩTnLacJump</i> , Sp <sup>R</sup>                                                                               |                                |
| A10-67     | <i>orfBΩTnLacJump</i> , Sp <sup>R</sup>                                                                                |                                |
| A11-79     | <i>orfCΩTnLacJump (orfC::lacZ)</i> , Sp <sup>R</sup>                                                                   |                                |
| A13-56     | <i>orf8ΩTnKRM</i> , Sp <sup>R</sup>                                                                                    |                                |
| A20-86     | <i>orfAΩTnLacJump (orfA::lacZ)</i> , Sp <sup>R</sup>                                                                   |                                |
| A23-33     | <i>orfFΩTnLacJump</i> , Sp <sup>R</sup>                                                                                |                                |
| S2-30      | <i>orfBΩTnKRM</i> , Sp <sup>R</sup>                                                                                    |                                |
| S11-14     | <i>orfBΩTnKRM</i> , Sp <sup>R</sup>                                                                                    |                                |
| S12-29     | <i>orfBΩTnKRM</i> , Sp <sup>R</sup>                                                                                    |                                |
| S21-28     | <i>orfCΩTnKRM</i> , Sp <sup>R</sup>                                                                                    |                                |
| S21-46     | <i>orfAΩTnKRM</i> , Sp <sup>R</sup>                                                                                    |                                |
| S31-22     | <i>yoaZΩTnKRM</i> , Sp <sup>R</sup>                                                                                    |                                |
| S35-30     | <i>orfEΩTnKRM</i> , Sp <sup>R</sup>                                                                                    |                                |
| A20-86-A   | <i>abrB::erm, orfAΩTnLacJump (orfD::lacZ)</i> , A20-86 x BKE00370 DNA, Em <sup>R</sup> Ln <sup>R</sup> Sp <sup>R</sup> |                                |

724

725 **Table 2.** Primers used in this study.

| Target                    | Forward Primer (5'-3')             | Reverse Primer (5'-3')            | Product Size (bp) |
|---------------------------|------------------------------------|-----------------------------------|-------------------|
| Sp <sup>R</sup>           | 2569R:<br>TCTGATTACCAATTAGAATGAAT  | 2570R:<br>GAATATACGGAAATTATGACTTA | 722               |
| <i>gfp</i>                | CGACATTGTGTGGACAGGTAA              | CCCGAAGGTTATGTACAGGAAAG           | 353               |
| <i>amyE</i>               | AGGCTGGGCAGTGATTGCTT               | ACTTCCGCGGTCGCCTATTT              | 110               |
| <i>toxR</i>               | AATCCATGGATTCCACGCGTTAT            | CACCAATCTGACGGAACTGAGATT<br>C     | 103               |
| Transposon insertion site | 2569:<br>ATATTCATTCTAATTGGTAATCAGA | 2570:<br>CTAAGTCATAATTTCCGTATATTC | Variable          |
| <i>pcrA</i> → <i>ligA</i> | CGAACAAATATGAACCCGGAAT             | GTGCAAATCACGGAGATCATCT            | 606               |
| <i>ligA</i> → <i>orf1</i> | GGAACAACGTCAAGAAACGAT              | CAGATAATCGTCAGTAGAGAAAGA<br>ATC   | 505               |
| <i>orf1</i> → <i>orf2</i> | CGAGGTCTTTAAGCGGTTCA               | AGCAGGAGCACGATTTGATC              | 868               |
| <i>orf2</i> → <i>orfA</i> | CTGTGCGCTCAGCATAACAATAAGTAC        | CAAGCGCGCCATCATATAAAGAG           | 604               |
| <i>orfA</i> → <i>orf3</i> | GTCTGACAGTCAGTCTTGATTTGACT         | TGCTCAGCCATATATTGCTCGTA           | 855               |
| <i>orf3</i> → <i>orf4</i> | GTCAGCAGCGAACAAAGAATA              | GTCTGGCTTCATATGACAAGT             | 702               |
| <i>orf4</i> → <i>orf5</i> | GCAATACCGCCTCGCAT                  | GGCTCAGTCGTGAATTGAAT              | 1166              |
| <i>orf5</i> → <i>orf6</i> | GCATTTGGACGGTTCAAGAT               | GGATCGACGATTAGATCCTTATA           | 627               |
| <i>orf6</i> → <i>orf8</i> | GACCTGAGCCGGATTCAG                 | GTTGAGACAATGCAAACGCT              | 742               |
| <i>orf8</i> → <i>orfB</i> | CGAGGTTTCTGATGACCAGATA             | CGAACCGTTTCTGCTCCAT               | 732               |
| <i>orfB</i> → <i>orfC</i> | GCAGCGGATCATCGGTAT                 | GAAGCTCCGGATGCCTTTAAG             | 754               |
| <i>orfC</i> → <i>orfD</i> | GAATCTGACGAGCAGGTCATA              | GTCAAAGAAGATGAACAGGCTG            | 894               |
| <i>orfD</i> → <i>orfE</i> | GAGCAACACCAAGGAATCCT               | ACGAAGCAGCGTCTCATCTA              | 692               |
| <i>orfE</i> → <i>orfF</i> | GGAGCAAGTCGGCATAACAT               | CAGTCTGCACCATCATGCT               | 819               |
| <i>orfF</i> → <i>orf9</i> | GAAATTCGCTGCTCGCTGT                | GTAGAGGAGAATGCTGATATCATT<br>CAC   | 840               |
| <i>orf9</i> → <i>phoA</i> | CAGCAGGCAGACGATTTAATG              | CAGGCTGGACGACGTTA                 | 680               |

726

727 **Table 3.** Effect of T1 and A3-41 on D4 growth. Average *toxR* copy number for D4 cultures  
728 grown in 2216 medium mixed with T1 or A3-41 after 3- and 24-hours was determined as  
729 described in Methods. Initial cell density for strain A4 was  $2 \times 10^4$  CFU/ml. Results are  
730 the average of four replicates per sample.

| Addition to D4 Culture<br>(CFU/ml), final concentration | <i>toxR</i> Copy Number per ml Culture |                                       |
|---------------------------------------------------------|----------------------------------------|---------------------------------------|
|                                                         | 3 hrs                                  | 24 hrs                                |
| None                                                    | $1.6 \times 10^5 \pm 0.3 \times 10^5$  | $1.3 \times 10^9 \pm 0.5 \times 10^9$ |
| T1 @ $2 \times 10^4$                                    | $8.8 \times 10^5 \pm 6.5 \times 10^5$  | $1.5 \times 10^9 \pm 0.9 \times 10^9$ |
| T1 @ $2 \times 10^5$                                    | $8.8 \times 10^5 \pm 6.3 \times 10^5$  | $8.8 \times 10^8 \pm 1.5 \times 10^8$ |
| T1 @ $2 \times 10^6$                                    | $1.7 \times 10^5 \pm 0.6 \times 10^5$  | $1.2 \times 10^6 \pm 0.2 \times 10^6$ |
| A3-41 @ $2 \times 10^4$                                 | $7.5 \times 10^5 \pm 7.1 \times 10^5$  | $7.0 \times 10^9 \pm 2.0 \times 10^9$ |
| A3-41 @ $2 \times 10^5$                                 | $1.4 \times 10^6 \pm 1.0 \times 10^6$  | $3.1 \times 10^9 \pm 0.7 \times 10^9$ |
| A3-41 @ $2 \times 10^6$                                 | $1.9 \times 10^5 \pm 1.0 \times 10^5$  | $2.1 \times 10^9 \pm 1.6 \times 10^9$ |

731

732

733 **Table 4.** Effect of cell-free culture supernatant on D4 growth. Average *toxR* copy number  
734 for D4 cultures grown with supernatant fractions from 18 hr cultures (50% of the total  
735 culture volume) were determined as described in Methods. Samples were taken 5.5 hrs  
736 after inoculation. Results are the averages of four technical replicates for each sample.

737

| Addition to D4 culture | <i>toxR</i> copy number per ml        |
|------------------------|---------------------------------------|
| +50% 2216 medium       | $5.3 \times 10^7 \pm 0.7 \times 10^7$ |
| +50% D4 supernatant    | $5.0 \times 10^6 \pm 1.2 \times 10^6$ |
| +50% T1 supernatant    | $1.8 \times 10^2 \pm 0.7 \times 10^2$ |
| +50% A3-41 supernatant | $1.5 \times 10^7 \pm 0.4 \times 10^7$ |

738

739

740 **Table 5.** Summary of transposon insertion sites in T1 mutants. Shown are the delivery  
 741 vector used to create the mutant, location of the insertion site, gene and its putative  
 742 product, and the nucleotide location. Accession number for the DNA sequence is  
 743 MT366812. Unless otherwise indicated, nucleotide position of the insertion site is relative  
 744 to the start of the *pcrA* gene, the first gene of the sequenced region. NRPS, non-  
 745 ribosomal peptide synthetase; PKS, polyketide synthase.

| Mutant | Delivery Vector | Transposon Insertion Site | Gene, Putative Gene Product                             | NRPS-PKS ORF Location |
|--------|-----------------|---------------------------|---------------------------------------------------------|-----------------------|
| A20-86 | pDP384          | 8,534                     | <i>orfA</i> , NRPS                                      | 7,036 to 11,532       |
| S21-46 | pEP4            | 9,917                     |                                                         |                       |
| A13-56 | pDP384          | 18,057                    | <i>orf8</i> , Acyl CoA Dehydrogenase                    | 16,935 to 18,062      |
| A2-30  | pEP4            | 19,316                    | <i>orfB</i> , NRPS                                      | 18,084 to 27,179      |
| A10-67 | pDP384          | 19,316                    |                                                         |                       |
| S11-14 | pEP4            | 21,936                    |                                                         |                       |
| S12-29 | pEP4            | 21,936                    |                                                         |                       |
| A3-41  | pDP384          | 24,490                    |                                                         |                       |
| A11-79 | pDP384          | 27,466                    | <i>orfC</i> , NRPS                                      | 27,199 to 29,868      |
| S21-28 | pEP4            | 28,790                    |                                                         |                       |
| A1-20  | pDP384          | 32,220                    | <i>orfD</i> , PKS                                       | 29,861 to 34,387      |
| S35-30 | pEP4            | 34,499                    | <i>orfE</i> , PKS                                       | 34,405 to 41,949      |
| A23-33 | pDP384          | 44,976                    | <i>orfF</i> , PKS                                       | 41,951 to 48,379      |
| A2-18  | pDP384          | 399*                      | <i>oppA</i> ; ABC transporter substrate-binding protein | NA                    |
| S31-22 | pEP4            | 427*                      | <i>yoaZ</i> ; putative oxidative stress response factor | NA                    |
| A8-11  | pDP384          | 68*                       | <i>spo0A</i> ; sporulation master regulator             | NA                    |

746 \*relative to the initiation codon of the corresponding gene in *B. subtilis* (NC\_000964.3); NA,  
 747 not applicable

748

749 **Table 6.  $\beta$ -Galactosidase activities of T1 strains at different stages of growth.**

| Strain   | Relevant genotype            | $\beta$ -Galactosidase Activity (nmoles/min/OD <sub>600</sub> ) |                |                |
|----------|------------------------------|-----------------------------------------------------------------|----------------|----------------|
|          |                              | Growth Stage*                                                   |                |                |
|          |                              | T <sub>-1</sub>                                                 | T <sub>0</sub> | T <sub>1</sub> |
| T1g      |                              | 167±29                                                          | 108±39         | 206±79         |
| A20-86   | <i>orfA::lacZ</i>            | 140±51                                                          | 5805±158       | 8660±610       |
| A3-41    | <i>orfB::lacZ</i>            | 224±53                                                          | 3898±35        | 5941±180       |
| A11-79   | <i>orfC::lacZ</i>            | 180±59                                                          | 4670±1060      | 7012±650       |
| A1-20    | <i>orfD::lacZ</i>            | 115±24                                                          | 3905±714       | 5440±124       |
| A20-86-A | <i>orfA::lacZ; abrB::erm</i> | 7288±498                                                        | 5888±296       | 7240±260       |

750 Strains were grown in 2216 broth and  $\beta$ -galactosidase levels were measured as described in

751 Methods. \*T<sub>-1</sub>, OD<sub>600</sub> ~1; T<sub>0</sub>, OD<sub>600</sub> ~3; T<sub>1</sub>, OD<sub>600</sub> 4-5



752 **FIGURE LEGENDS**

753 **Figure 1.** Soft-agar overlay assays for *B. subtilis* strains T1 (left) and SMY (right)  
754 against *pirAB*-harboring *V. parahaemolyticus* strains D4 (A) and A3 (B), and a non-  
755 *pirAB* *V. parahaemolyticus* strain (C). Assays were done as described in Methods. A  
756 zone of clearance around a colony indicates the absence of growth of the *Vibrio* spp.

757

758 **Figure 2.** Effect of culture supernatant on D4 growth. Growth of an untreated D4 culture  
759 (●) and cultures mixed with an equal volume of cell-free supernatant fractions prepared  
760 from overnight cultures of wild-type T1 (■), D4 (▲), and A3-41 (◆). All cultures were  
761 grown in 2216 broth. The dotted line indicates anticipated growth. Graph shows results  
762 for a representative experiment and standard deviations were <10% and were omitted for  
763 clarity.

764

765 **Figure 3.** Soft-agar overlay assays for select T1 mutants (left) and wild-type T1 (right)  
766 against strain D4. Assays were done as described in Methods.

767

768 **Figure 4.** Genetic and transcription map of the NRPS-PK region of strain T1 and  
769 mutant insertion sites. See text for details.

770

771 **Figure 5.** Transcription mapping of the NRPS-PK region. Predicted open reading  
772 frames and gel electrophoresis of RT-PCR products generated using T1 RNA isolated  
773 from stationary phase cultures (T<sub>1</sub> to T<sub>2</sub>). Primer pairs targeting open reading frame  
774 termini in the NRPS-PK region as well as upstream and downstream genes, as

775 indicated, are described in Methods and Table 2. Lanes with a G are PCR reactions  
776 containing genomic DNA (-RT, -DNase); N, PCR with RNA and DNase but without RT,  
777 and; C, RT-PCR of RNA after DNase treatment. The absence of RT product for *orf1*-  
778 *orf2* and *orf9-phoA* regions is indicated by triangles (▲); potential transcription  
779 terminators are indicated by a “T”.

780

781 **Figure 6.** The *orf2* promoter region. Putative regulatory and promoter features for the  
782 DNA sequence between the last 13 codons and first four codons of *orf1* and *orf2* open  
783 reading frames, respectively, are shown. Also shown are the consensus sequences  
784 and recognition sites for  $\sigma^A$  (double underlined),  $\sigma^H$  (single underlined), and Spo0A  
785 (boxed). Bases that agree with consensus sequences are capitalized.

786

787 **Figure 7.** Deletion of *abrB* results in enhanced anti-D4 activity. Growth of an untreated  
788 D4 culture (●) and cultures mixed with an equal volume of cell-free supernatant  
789 fractions prepared from overnight cultures of wild-type T1 (▲) or SSb1(*abrB*<sup>-</sup>) (■) as  
790 described in Methods. Dotted lines indicate anticipated growth. Graph shows results  
791 for a representative experiment and standard deviations were <10% and were omitted  
792 for clarity. Inset: photograph of 26-hour cultures; (A) D4 alone, (B) D4 with cell-free  
793 supernatants from T1, (C) D4 with cell-free supernatant of SSb1.

794 **Fig. 1**

795

796

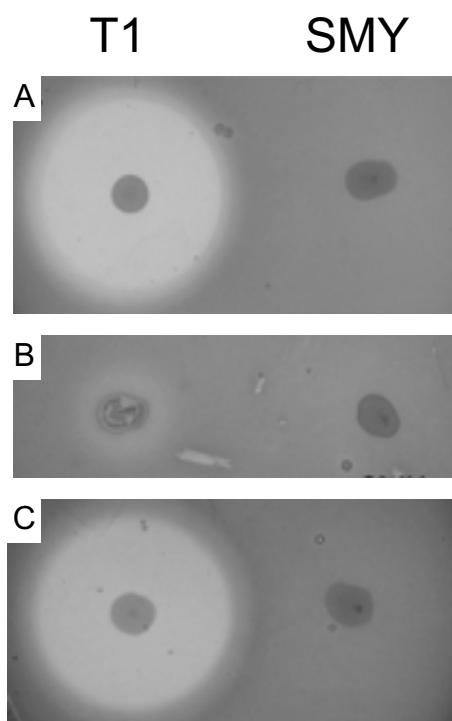

797

798

799 **Fig. 2**

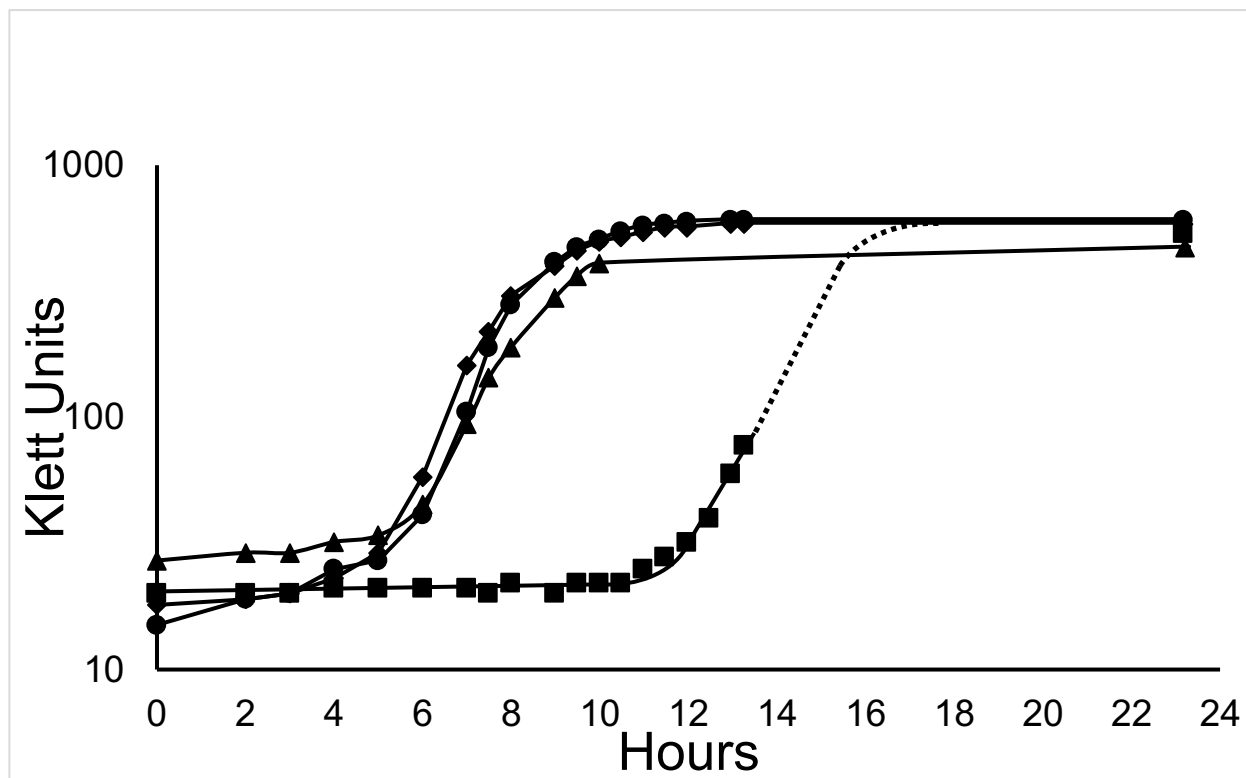

800

801

T1

802 **Fig. 3**

803

804

A2-18  
(*oppA*<sup>-</sup>)

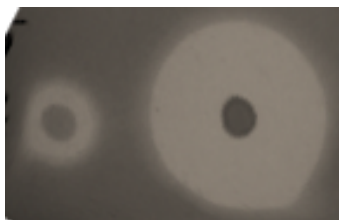

A3-41  
(*orfB*<sup>-</sup>)

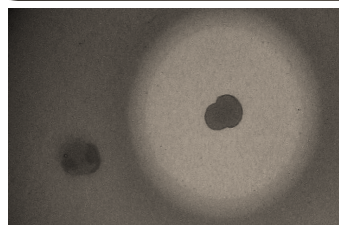

A11-79  
(*orfC*<sup>-</sup>)

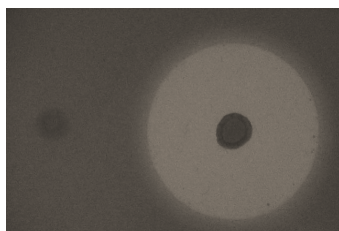

A20-86  
(*orfA*<sup>-</sup>)

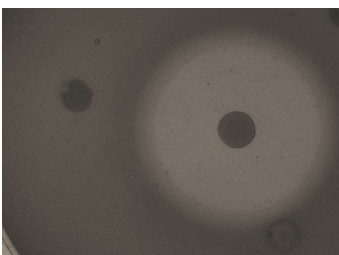

SSh1  
(*sigH*<sup>-</sup>)

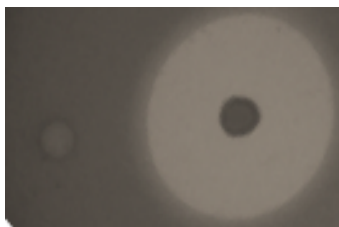

SSb1  
(*abrB*<sup>-</sup>)

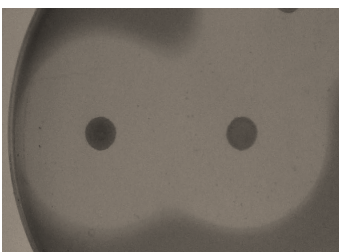

805 **Fig. 4**

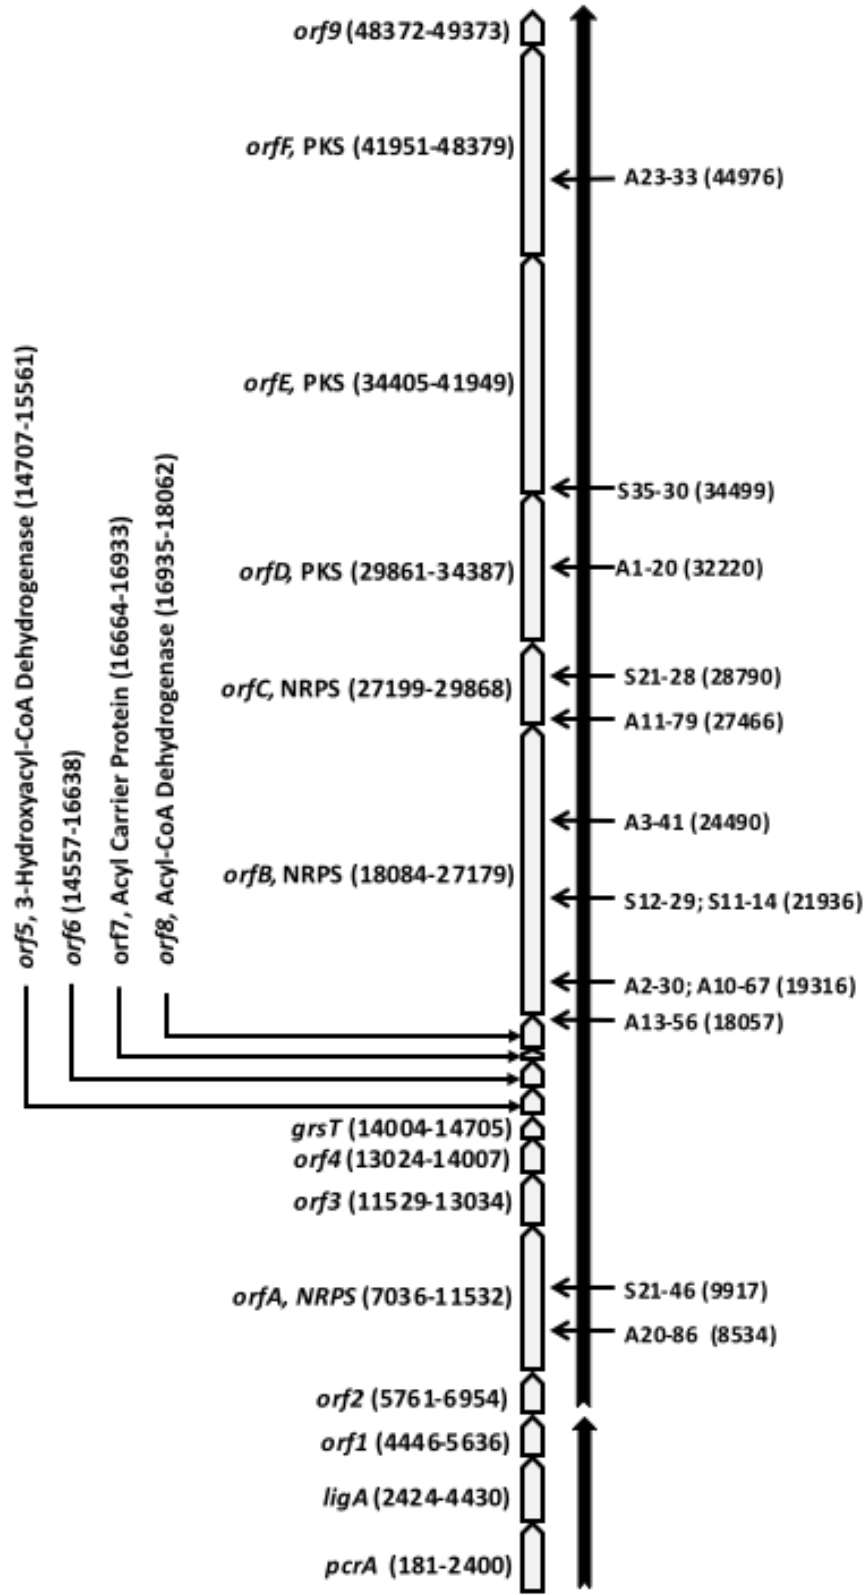

806

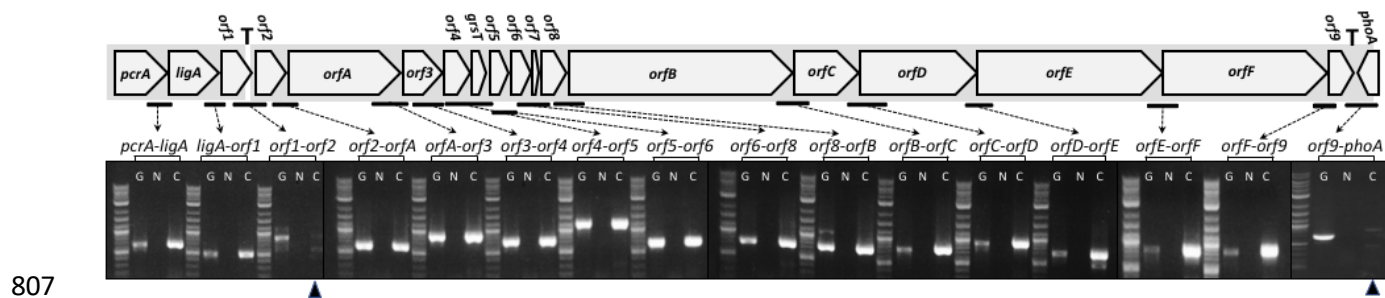

807

808 **Fig. 5**

809  
810 ->*orf1*...aat gcg gga gat aaa gag ccg act gtt cac att **TaT GaC tAA**  
811  
812 Tattggatg←acccttgtgccgctgcggcgcaggggttttttgcgtttttttgaaggttaagtag  
813  
814 cattggAgAGGgTATttatattatggttAtGATgTtctaaaaatagaaaagggttgaaatt ATG  
815  
816 AAA AAT AAA...*orf2* ->

817  
818  $\sigma^A$  recognition site:  
819  
820 TTGgagagggtatttatttatgtTATgAT *orf2<sub>p</sub>* -35/-10  
821 TTGaca-----TATaAT Consensus

822  
823  $\sigma^H$  recognition site :  
824  
825 AgAGGgTATttatattatggttatGATgT *orf2<sub>p</sub>* -35/-10  
826 R-AGGaWW-----r--GATwa Consensus

827  
828 Spo0A binding site:  
829  
830 **TaTGaCtAA** Spo0A (putative)  
831 **TtTGtCrAA** Consensus

832  
833  
834 **Fig. 6.**



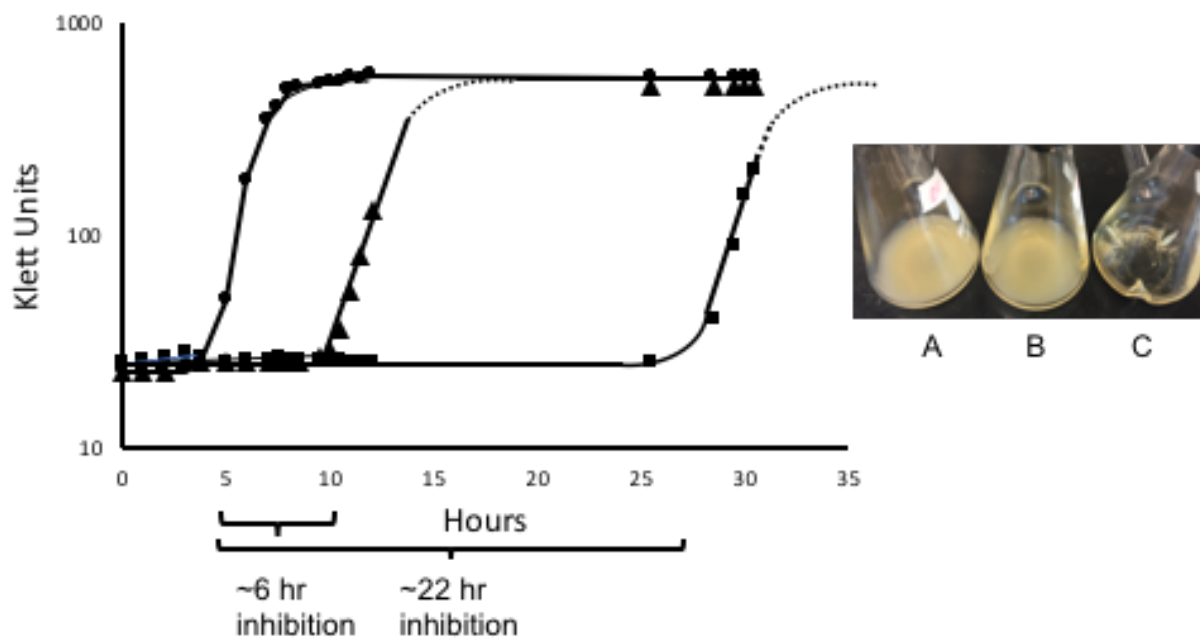

835

836 **Fig. 7.**
